# Supplementary material for: Nutrition disparities and the global burden of malnutrition
Source: PubMed Central journal article supplement — BMJ. 2018 Jun 13;361:k2252. doi: 10.1136/bmj.k2252 (PMC5996967; doi:10.1136/bmj.k2252), 2018-06-13
Supplement: perr044826.www.pdf [file perr044826.www.pdf]

## WEB ANNEX 1

### Methodological notes on the equity analyses

Stunting and overweight were defined as recommended by WHO, based on WHO child growth standards. Stunting was considered when length for age below -2 Z scores and overweight was considered when BMI for age above 2 Z scores.

Data presented are from the most recent Demographic and Health Surveys (DHS) or UNICEF's Multiple Indicator Cluster Survey (MICS) in each country, dated 2010 or later, with publicly available datasets as of mid-2017. Wealth quintiles were calculated from household asset indices using standard methods adopted by DHS and MICS.

Data were available for 80 countries; the list of countries and their distribution by UNICEF regions is shown below. Because data are not available for all countries in each region, we opted to report unweighted averages. The graphs in the manuscript show unweighted averages of stunting prevalence by wealth quintile, by UNICEF region.

Analyses carried out by C Victora from the International Center for Equity in Health, Federal University of Pelotas, Brazil.

### Countries included in the analyses, by UNICEF regions

#### CEE and CIS: 11 countries

|                        |              |
|------------------------|--------------|
| Armenia                | Moldova      |
| Bosnia and Herzegovina | Montenegro   |
| Kazakhstan             | Serbia       |
| Kosovo                 | Tajikistan   |
| Kyrgyz Republic        | Turkmenistan |
| Macedonia              |              |

#### East Asia and Pacific: 6 countries

|          |          |
|----------|----------|
| Cambodia | Myanmar  |
| Lao PDR  | Thailand |
| Mongolia | Vietnam  |

#### Eastern and southern Africa: 16 countries

|            |             |
|------------|-------------|
| Angola     | Namibia     |
| Burundi    | Rwanda      |
| Comoros    | South Sudan |
| Ethiopia   | Swaziland   |
| Kenya      | Tanzania    |
| Lesotho    | Uganda      |
| Malawi     | Zambia      |
| Mozambique | Zimbabwe    |

**Latin America and Caribbean: 13 countries**

|                    |             |
|--------------------|-------------|
| Barbados           | Haiti       |
| Belize             | Honduras    |
| Colombia           | Mexico      |
| Dominican Republic | Peru        |
| El Salvador        | Saint Lucia |
| Guatemala          | Suriname    |
| Guyana             |             |

**Middle East and north Africa: 8 countries**

|         |                    |
|---------|--------------------|
| Algeria | State of Palestine |
| Egypt   | Sudan              |
| Iraq    | Tunisia            |
| Jordan  | Yemen, Rep.        |

**South Asia: 4 countries**

|            |          |
|------------|----------|
| Bangladesh | Nepal    |
| Bhutan     | Pakistan |

**West and central Africa: 22 countries**

|                      |                       |
|----------------------|-----------------------|
| Benin                | Guinea                |
| Burkina Faso         | Guinea-Bissau         |
| Cameroon             | Liberia               |
| Central African Rep. | Mali                  |
| Chad                 | Mauritania            |
| Congo, Dem. Rep.     | Niger                 |
| Congo, Rep.          | Nigeria               |
| Côte d'Ivoire        | Sao Tome and Principe |
| Gabon                | Senegal               |
| Gambia, The          | Sierra Leone          |
| Ghana                | Togo                  |

## Countries' distribution by UNICEF region

- CEE and CIS: **11** countries

|                        |              |
|------------------------|--------------|
| Armenia                | Moldova      |
| Bosnia and Herzegovina | Montenegro   |
| Kazakhstan             | Serbia       |
| Kosovo                 | Tajikistan   |
| Kyrgyz Republic        | Turkmenistan |
| Macedonia              |              |

- East Asia and Pacific: **6** countries

|          |          |
|----------|----------|
| Cambodia | Myanmar  |
| Lao PDR  | Thailand |
| Mongolia | Vietnam  |

- Eastern and southern Africa: **16** countries

|            |             |
|------------|-------------|
| Angola     | Namibia     |
| Burundi    | Rwanda      |
| Comoros    | South Sudan |
| Ethiopia   | Swaziland   |
| Kenya      | Tanzania    |
| Lesotho    | Uganda      |
| Malawi     | Zambia      |
| Mozambique | Zimbabwe    |

- Latin America and Caribbean: **13** countries

|                    |             |
|--------------------|-------------|
| Barbados           | Haiti       |
| Belize             | Honduras    |
| Colombia           | Mexico      |
| Dominican Republic | Peru        |
| El Salvador        | Saint Lucia |
| Guatemala          | Suriname    |
| Guyana             |             |

- Middle East and north Africa: **8** countries

|         |                    |
|---------|--------------------|
| Algeria | State of Palestine |
| Egypt   | Sudan              |
| Iraq    | Tunisia            |
| Jordan  | Yemen, Rep.        |

- South Asia: **4** countries

|            |          |
|------------|----------|
| Bangladesh | Nepal    |
| Bhutan     | Pakistan |

- West and central Africa: **22** countries

|                      |                       |
|----------------------|-----------------------|
| Benin                | Guinea                |
| Burkina Faso         | Guinea-Bissau         |
| Cameroon             | Liberia               |
| Central African Rep. | Mali                  |
| Chad                 | Mauritania            |
| Congo, Dem. Rep.     | Niger                 |
| Congo, Rep.          | Nigeria               |
| Côte d'Ivoire        | Sao Tome and Principe |
| Gabon                | Senegal               |
| Gambia, The          | Sierra Leone          |
| Ghana                | Togo                  |
